# Supplementary material for: ACE2 and Furin Expressions in Oral Epithelial Cells Possibly Facilitate COVID-19 Infection via Respiratory and Fecal–Oral Routes
Source: PubMed Central journal article supplement (PMC7758442; doi:10.3389/fmed.2020.580796), 2020-12-10
Supplement: Image_1.pdf [file Image_1.pdf]

**Supplementary Figure 1**

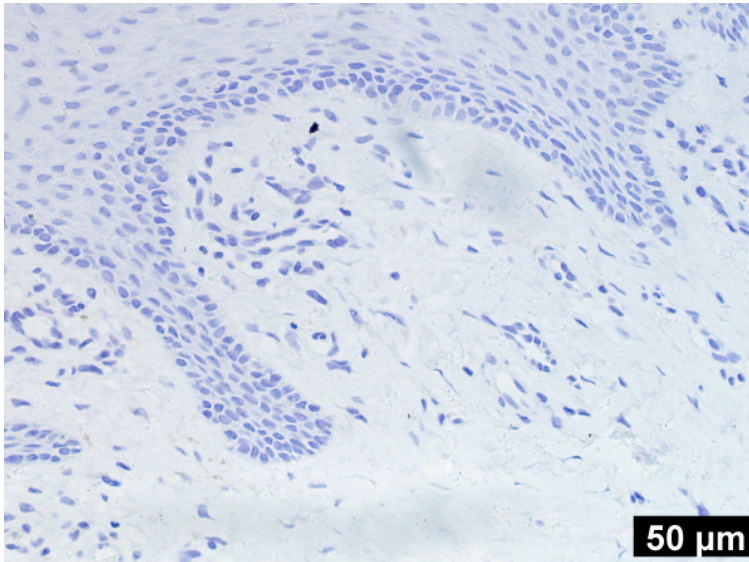

**Supplementary Figure 1.** Negative control image of oral tissue immunohistochemistry.
