# Supplementary material for: ACE2 and Furin Expressions in Oral Epithelial Cells Possibly Facilitate COVID-19 Infection via Respiratory and Fecal–Oral Routes
Source: PubMed Central journal article supplement (PMC7758442; doi:10.3389/fmed.2020.580796), 2020-12-10
Supplement: Table_1.pdf [file Table_1.pdf]

### Supplementary Table 1

| Designation | Age/Sex | Primary site         | Cancer stage | Grade | LVI     |
|-------------|---------|----------------------|--------------|-------|---------|
| MEP 6       | 88/F    | right floor of mouth | T4aN2c       | 1     | Absent  |
| MEP 8       | 82/F    | right hard palate    | T4aN0        | 1     | Absent  |
| MEP 16      | 63/F    | left lateral tongue  | T2N0         | 1     | Absent  |
| MEP 22      | 77/M    | left buccal mucosa   | T1N0         | 2     | Absent  |
| MEP 28      | 58/M    | right lateral tongue | T2N2c        | 1     | Present |

Table 1. Clinical characteristics and demographics of the patients included in dataset study.

(LVI = lymphovascular invasion)
